# Supplementary material for: Preoperative Serum Markers and Risk Classification in Intrahepatic Cholangiocarcinoma: A Multicenter Retrospective Study
Source: MDPI journal article supplement (doi:10.3390/cancers14215459), 2022-11-07
Supplement: s1 [file s1]

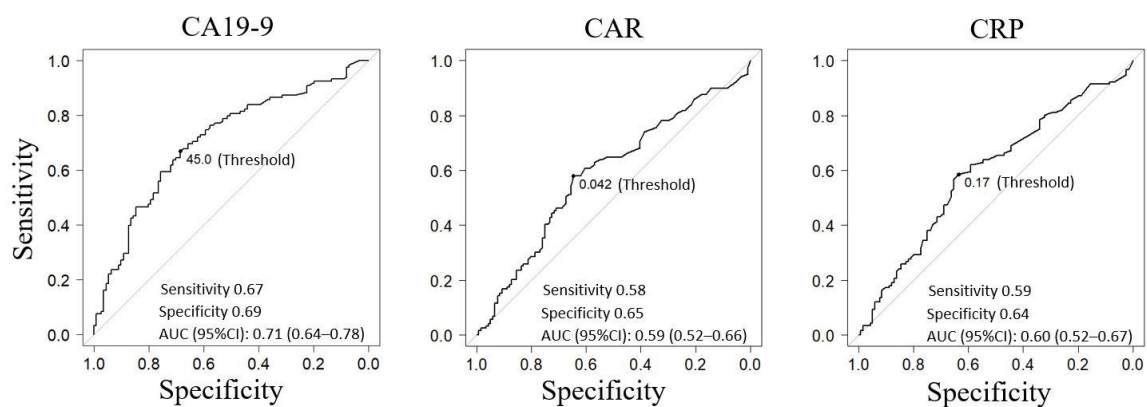

**Supplementary Figure S1.** ROC analysis of the value of preoperative prognostic factors with overall mortality as the outcome.
